# Supplementary material for: Spheres-on-sphere silica microspheres as matrix for horseradish peroxidase immobilization and detection of hydrogen peroxide
Source: Royal Society of Chemistry journal article supplement (doi:10.1039/c5ra03755g), 2015-01-01
Supplement: c5ra03755g1.pdf [file c5ra03755g1.pdf]

## Supporting information

### **Spheres-on-Sphere Silica Microspheres as Matrix for Horseradish Peroxidase Immobilization and Detection of Hydrogen Peroxide**

Zhen Lei,<sup>a,c</sup> Xia Liu,<sup>a,c</sup> Lina Ma,<sup>a</sup> Dianjun Liu,<sup>a</sup> Haifei Zhang<sup>\*b</sup> and Zhenxin Wang<sup>\*a</sup>

<sup>a</sup>State Key Laboratory of Electroanalytical Chemistry, Changchun Institute of Applied Chemistry, Chinese Academy of Sciences, Changchun, 130022, P. R. China.

<sup>b</sup>Department of Chemistry, University of Liverpool, Oxford Street, Liverpool, L69 7ZD, UK.

<sup>c</sup>University of Chinese Academy of Sciences, No.19A Yuquan Road, Beijing, 100049, P. R. China.

#### **CORRESPONDING AUTHOR INFORMATION**

E-mails: [Zhanghf@liverpool.ac.uk](mailto:Zhanghf@liverpool.ac.uk) (HZ) and [wangzx@ciac.ac.cn](mailto:wangzx@ciac.ac.cn) (ZW).

#### **Additional experimental section**

#### **Additional Scheme S1**

#### **Additional Figures S1-S4**

#### **Additional Tables S1-S2**

#### **Additional References S1-S2**

## **Additional experimental section**

*Preparation of human serum sample.* The serum sample was freshly prepared before use by literature reported methods.<sup>S1,S2</sup> Generally, frozen human plasma was thawed in a 37° C water bath. Then, 0.43 µL recombinant tissue factor (rTF) solution (11.6 nM), 4 µL procoagulant phospholipids (PL) solution (1mM) and 17 µL CaCl<sub>2</sub> solution (17 mM) were added in this order into 1 mL human plasma and mixed thoroughly. After incubation at 37° C for 30 min, the mixture was centrifuged at 4500 rpm for 10 min at 37° C. The supernatant (serum) was taken out, and diluted with PBS buffer (100 mM, pH 7.0) for subsequent experiment.

### Additional Schemes S1

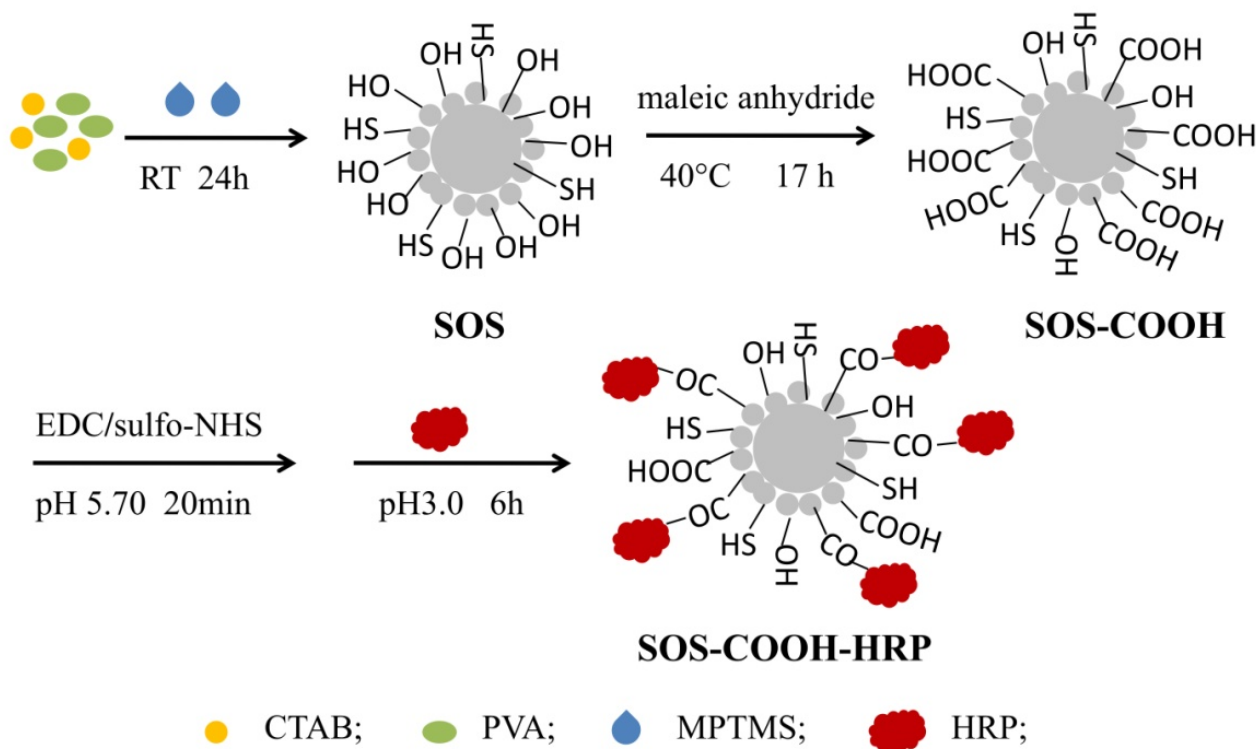

**Scheme S1.** The schematic representation of the synthesis SOS-COOH-HRP. The illustration is not drawn to scale.

## Additional Figures S1-S4

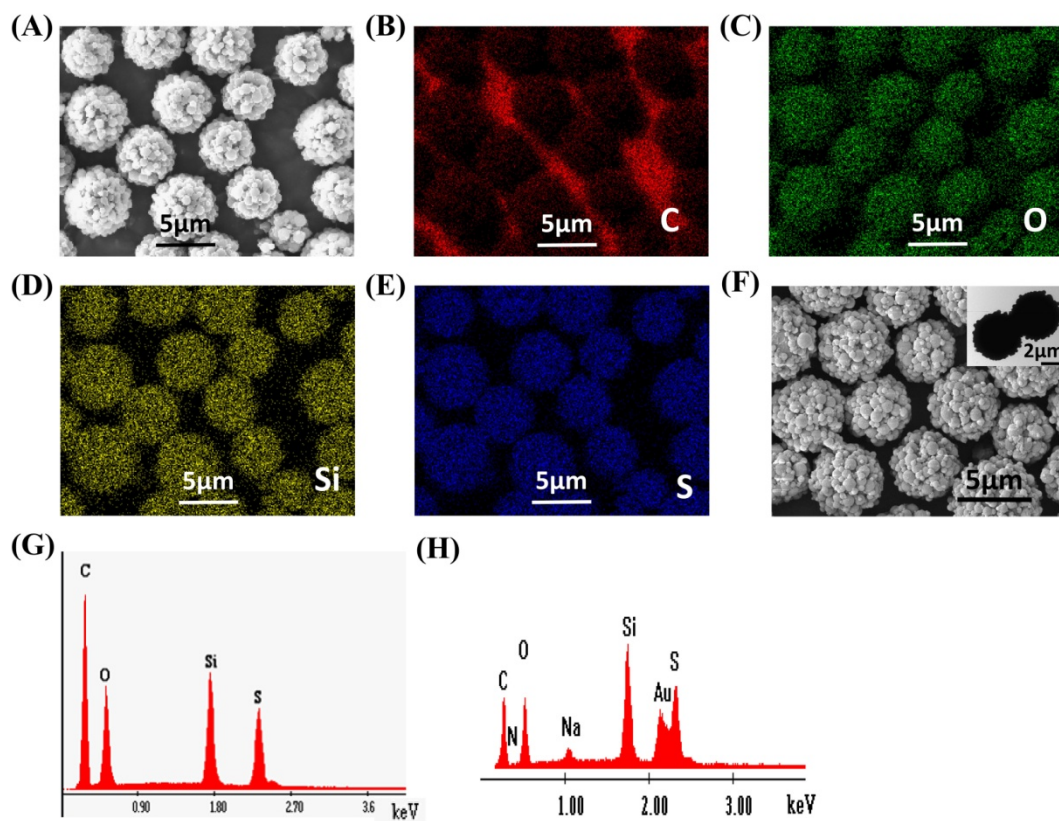

**Figure S1.** SEM image of the as-prepared SOS-COOH microspheres (A) and corresponding EDX mapping images (B, C, D, E); (F) SEM and TEM (inset of F) micrographs of the SOS-COOH-HRP, Energy-dispersive X-ray analysis (EDX) of the SOS-COOH microspheres (G) and the SOS-COOH-HRP (H).

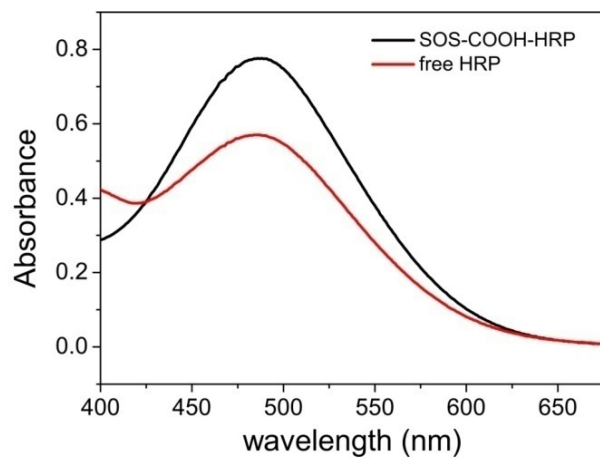

**Figure S2.** UV-Visible spectra of the catalytic oxidation of PSA and 4-AAP in the presence of H<sub>2</sub>O<sub>2</sub> by the same concentration of free HRP and SOS-COOH-HRP under the same reaction conditions.

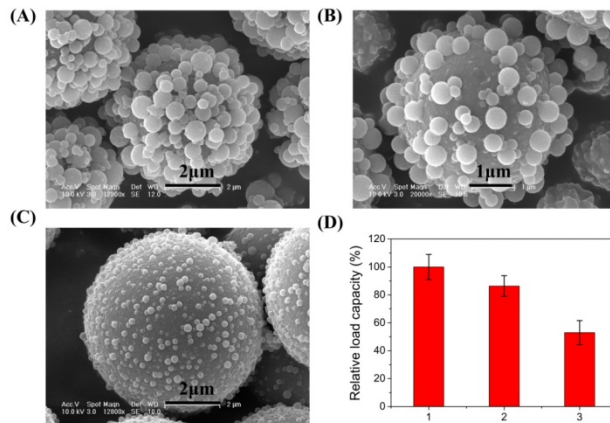

**Figure S3.** SEM images of three SOS-COOH microspheres with different nanospheres coverage on the surface (A, B, C). (D) Relative HRP load capacity of the three SOS-COOH microspheres; and the numbers 1, 2 and 3 are correspondent to microspheres as indicated in A, B, C, respectively.

The surface nanosphere coverage of SOS-COOH microsphere is strongly dependent on the concentration of ammonium hydroxide in the reaction mixture, i.e., the surface nanosphere coverage is decreased by increasing the concentration of ammonium hydroxide.

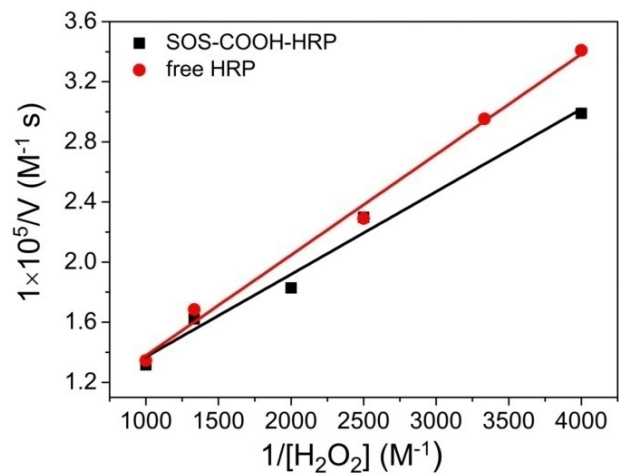

**Figure S4.** Double reciprocal plots of activity of SOS-COOH-HRP and free HRP with the varying concentrations of H<sub>2</sub>O<sub>2</sub>.

**Table S1.** Tolerance of coexisting substance (CS) in the determination of 500  $\mu\text{M}$   $\text{H}_2\text{O}_2$ 

| Coexisting substances | Tolerance [CS/ $\text{H}_2\text{O}_2$ ] | Relative error (%) | Coexisting substances     | Tolerance [CS/ $\text{H}_2\text{O}_2$ ] | Relative error (%) |
|-----------------------|-----------------------------------------|--------------------|---------------------------|-----------------------------------------|--------------------|
| $\text{K}^+$          | 100:1                                   | 0.63               | $\text{CH}_3\text{COO}^-$ | 200:1                                   | -1.46              |
| $\text{Mg}^{2+}$      | 100:1                                   | -3.64              | Glucose                   | 100:1                                   | -1.09              |
| $\text{Ca}^{2+}$      | 100:1                                   | -5.10              | Surcose                   | 100:1                                   | -1.18              |
| $\text{Pb}^{2+}$      | 100:1                                   | -1.45              | Maltose                   | 100:1                                   | -0.73              |
| $\text{Fe}^{3+}$      | 100:1                                   | -6.28              | L-Gly                     | 100:1                                   | 1.09               |
| $\text{NH}_4^+$       | 100:1                                   | -3.91              | L-Glu                     | 100:1                                   | 2.19               |
| $\text{NO}_3^-$       | 100:1                                   | 0.64               | L-Arg                     | 100:1                                   | 4.19               |
| $\text{SO}_4^{2-}$    | 100:1                                   | -3.64              | L-Phe                     | 100:1                                   | 1.09               |
| $\text{F}^-$          | 100:1                                   | -3.92              |                           |                                         |                    |



**Table S2.** Recovery rate of detecting spiked H<sub>2</sub>O<sub>2</sub> in 10% human serum

| Spiked [H <sub>2</sub> O <sub>2</sub> ] (μM) | 10     | 50    | 100    | 250   | 500   | 750   | 1000  |
|----------------------------------------------|--------|-------|--------|-------|-------|-------|-------|
| Recovery rate (%)                            | 102.75 | 98.75 | 108.35 | 94.45 | 95.60 | 94.67 | 96.96 |
| RSD (%)                                      | 6.41   | 3.62  | 2.56   | 5.43  | 2.83  | 1.51  | 1.57  |

### **Additional References**

S1 S. Centi, S. Tombelli, M. Minunni and M. Mascini, *Anal. Chem.*, 2007, **79**, 1466–1473.

S2 S. A. Smith, P. C. Comp and J. H. Morrissey, *J. Thromb. Haemostasis*, 2006, **4**, 820–827.
